# Supplementary material for: Urban mammals in Italy: how common species shape communities’ differentiation
Source: Research Square preprint supplement (doi:10.21203/rs.3.rs-8479625/v1), 2026-01-22
Supplement: Supplementary file 1 [file 96982cdc86da7ede10943578.docx]

**Urban mammals in Italy: how common species shape communities’ differentiation**

URBAN ECOSYSTEMS

Limonciello L.1,2,3, Mirone E2,3., Avramo V.2,3, Jamwal Singh P.2,3, Ieraci G.4, Coccia C.4, Mori E.2,5 Ancillotto L. 2,5, Viviano A.5, Di Febbraro M.3, Loy A.2,3

1. Department of Earth and Marine Sciences, University of Palermo, Via Archirafi 22, 90123, Palermo, Italy.
2. NBFC, National Future Biodiversity Centre, Piazza Marina, 61, 90133, Palermo, Italy.
3. Envix Lab, Department of Biosciences and Territory, University of Molise, 96090 Pesche, Isernia, Italy.
4. Department of Environmental Biology, Sapienza University, Piazzale Aldo Moro 5, 00185 Rome, Italy.
5. Research Institute on Terrestrial Ecosystems (IRET), National Research Council of Italy (CNR), Via Madonna del Piano 10, 50019, Sesto Fiorentino (FI), Italy.

Corresponding author: Vasco Avramo, vasco.avramo@gmail.com

# SUPPLEMENTARY

## **SUPP1:** Target species list

We focused on medium and large sized mammals (mean weight >1 kg, Lim and Pacheco 2016) regularly present in the Italian territory (Loy et al. 2019) and potentially occurring in the study areas. We selected a total of 21 target species, belonging to the order Carnivora (10 species), Cetartiodactyla (6 species), Eulipotyphla (1 species), Lagomorpha (3 species) and Rodentia (1 species). The complete species list is in Table S1.

| **Order** | **Species** | **Order** | **Species** |
| --- | --- | --- | --- |
| Carnivora | *Canis lupus* | Cetartiodactyla | *Capreolus capreolus* |
| Carnivora | *Canis lupus familiaris* | Cetartiodactyla | *Cervus elaphus* |
| Carnivora | *Martes foina* | Cetartiodactyla | *Dama dama* |
| Carnivora | *Martes martes* | Cetartiodactyla | *Ovis aries* |
| Carnivora | *Meles meles* | Cetartiodactyla | *Sus scrofa* |
| Carnivora | *Felis catus* | Eulipotyphla | *Erinaceous europaeus* |
| Carnivora | *Felis silvestris* | Lagomorpha | *Lepus europaeus* |
| Carnivora | *Mustela nivalis* | Lagomorpha | *Oryctolagus cuniculus* |
| Carnivora | *Mustela putorius* | Lagomorpha | *Sylvilagus floridanus* |
| Carnivora | *Vulpes vulpes* | Rodentia | *Hystrix cristata* |
| Cetartiodactyla | *Bos taurus* |  |  |

**Table S1.** Complete target species list, with species listed by order.

## **SUPP2:** Sampling design

We relied on a standardized design shared across the other working groups of the National Biodiversity Future Centre (NBFC) – Spoke Urban. The study areas were divided into 1 × 1 km² gridcells, each characterized by a combination of green area extent and fragmentation gradients, resulting in 16 cell categories. Green areas included all the vegetated surfaces except agricultural land, according to the National Land Cover Map provided by Italian Institute for Environmental Protection and Research (ISPRA 2019).

The extent of green areas was calculated as the cumulative area of all green patches intersecting a cell. Each cell was then assigned to a class A to D (A: 0–0.02 km², B: 0.02–0.24 km², C: 0.24–1 km², D: >1 km²). An Aggregation Index (AI) for green areas fragmentation was computed within a 1.5 km radius circular buffer centred on the cell centroid. The index spans from 0-100, with 0=extreme fragmentation and 100=no fragmentation. Cells were then assigned a class 1 to 4 based on AI (AI <67, highly fragmented), 2 (67–73), 3 (73–81), 4 (>81, minimally fragmented) (Dondina et al. 2025).

The final cell selection included a total of 48 cells, 11 in Milan, 14 in Florence, 14 in Rome and 9 in Campobasso. In Table S2, we provide additional information relative to each gridcell.

| **Cell ID** | **Study Area** | **Green cover area (km2)** | **Green cover category** | **Green Fragmentation index (AI)** | **Green fragmentation category** | **Cell category** | **CT latitude** | **CT longitude** |
| --- | --- | --- | --- | --- | --- | --- | --- | --- |
| 1184 | MI | 0.117185 | B | 55.59 | 1 | B1 | 45,40900 | 9,050600 |
| 1282 | MI | 0.145402 | B | 71.83 | 2 | B2 | 45,43386 | 9,077583 |
| 1041 | MI | 0.179138 | B | 76.09 | 3 | B3 | 45,44978 | 9,010441 |
| 1191 | MI | 0.095873 | B | 81.89 | 4 | B4 | 45,46773 | 9,048679 |
| 897 | MI | 0.282706 | C | 64.98 | 1 | C1 | 45,56076 | 8,966732 |
| 1049 | MI | 0.279198 | C | 69.13 | 2 | C2 | 45,52375 | 9,015411 |
| 1659 | MI | 0.51269 | C | 71.84 | 2 | C2 | 45,47393 | 9,181100 |
| 1570 | MI | 0.698538 | C | 78.25 | 3 | C3 | 45,50869 | 9,150497 |
| 893 | MI | 0.91913 | C | 81.18 | 4 | C4 | 45,51899 | 8,972986 |
| 405 | MI | 6378074 | D | 96.73 | 4 | D4 | 45,40959 | 8,850228 |
| 1380 | MI | 1711755 | D | 83.54 | 4 | D4 | 45,48586 | 9,098554 |
| 1948 | FI | 0.160405 | B | 72,08 | 2 | B2 | 43,83533 | 11,16804 |
| 3064 | FI | 0.145894 | B | 79.28 | 3 | B3 | 43,77983 | 11,33802 |
| 3150 | FI | 0.108894 | B | 83.29 | 4 | B4 | 43,77643 | 11,34992 |
| 2372 | FI | 0.307401 | C | 66.24 | 1 | C1 | 43,79468 | 11,23724 |
| 1940 | FI | 0.313912 | C | 69.71 | 2 | C2 | 43,75765 | 11,17579 |
| 2117 | FI | 0.783221 | C | 72.04 | 2 | C2 | 43,82141 | 11,19904 |
| 2034 | FI | 0.559317 | C | 75.99 | 3 | C3 | 43,84558 | 11,18421 |
| 2977 | FI | 0.313387 | C | 78.91 | 3 | C3 | 43,77503 | 11,32198 |
| 1945 | FI | 0.811942 | C | 82.35 | 4 | C4 | 43,80268 | 11,18028 |
| 2199 | FI | 1367032 | D | 77.87 | 3 | D3 | 43,78687 | 11,20946 |
| 2460 | FI | 2704757 | D | 80.20 | 3 | D3 | 43,81868 | 11,24136 |
| 1536 | FI | 2102794 | D | 82.46 | 4 | D4 | 43,76155 | 11,10604 |
| 2294 | FI | 499741847 | D | 97.70 | 4 | D4 | 43,86546 | 11,22460 |
| 2893 | FI | 1883311 | D | 86.74 | 4 | D4 | 43,80478 | 11,30557 |
| 2462 | RM | 0.158711 | B | 57.83 | 1 | B1 | 41,79798 | 12,37901 |
| 3411 | RM | 0.183562 | B | 71.76 | 2 | B2 | 41,90337 | 12,52099 |
| 4003 | RM | 0.138274 | B | 77.34 | 3 | B3 | 41,91316 | 12,58472 |
| 3612 | RM | 0.193496 | B | 79.36 | 3 | B3 | 41,99616 | 12,53891 |
| 2875 | RM | 0.226149 | B | 84.02 | 4 | B4 | 41,90954 | 12,44139 |
| 4015 | RM | 0.166687 | B | 85.91 | 4 | B4 | 42,01717 | 12,58742 |
| 3503 | RM | 0.298001 | C | 66.91 | 1 | C1 | 41,87336 | 12,52425 |
| 3045 | RM | 0.844293 | C | 72.62 | 2 | C2 | 41,89277 | 12,46268 |
| 3224 | RM | 0.639985 | C | 73.08 | 3 | C3 | 41,88321 | 12,49573 |
| 3912 | RM | 0.615309 | C | 88.12 | 4 | C4 | 42,01247 | 12,58529 |
| 3227 | RM | 0.991327 | C | 82.93 | 4 | C4 | 41,91462 | 12,49035 |
| 3220 | RM | 1446 | D | 72.51 | 2 | D2 | 41,84754 | 12,49531 |
| 3605 | RM | 1249 | D | 80.63 | 3 | D3 | 41,93256 | 12,54688 |
| 2873 | RM | 3353 | D | 86.97 | 4 | D4 | 41,88478 | 12,44565 |
| 1720 | CB | 0.228377 | B | 70.25 | 2 | B2 | 41,57749 | 14,69256 |
| 1721 | CB | 0.174764 | B | 78.09 | 3 | B3 | 41,59298 | 14,69659 |
| 1806 | CB | 0.147345 | B | 85.95 | 4 | B4 | 41,58717 | 14,70780 |
| 1473 | CB | 0.489465 | C | 72.26 | 2 | C2 | 41,56602 | 14,65434 |
| 1472 | CB | 0.346084 | C | 77.19 | 3 | C3 | 41,55583 | 14,64847 |
| 1395 | CB | 0.414519 | C | 87.79 | 4 | C4 | 41,58271 | 14,64607 |
| 1632 | CB | 1499501 | D | 70.58 | 2 | D2 | 41,53784 | 14,67930 |
| 1550 | CB | 1566705 | D | 77.78 | 3 | D3 | 41,53992 | 14,66932 |
| 1159 | CB | 22946103 | D | 97.88 | 4 | D4 | 41,54576 | 14,60430 |

**Table S2.** Gridcells selected for the study, with absolute and categorical values of green cover and green fragmentation, and coordinates of the camera traps placed in each cell.

## **SUPP3:** Species’ independent detections

We recorded a total of 24 mammal species (18 native, 3 domestic, and 3 exotic) over 8,759 trap-days. For each species, the table below (Table S3) reports the number of independent detection events.

| **Common name** | **Scientific name** | # of ind. obs. | **Common name** | **Scientific name** | # of ind. obs. |
| --- | --- | --- | --- | --- | --- |
| Grey Wolf | *Canis lupus* | 18 | House mouse | *Mus musculus* | 30 |
| Domestic dog | *Canis lupus familiaris* | 1649 | Least weasel | *Mustela nivalis* | 1 |
| Roe deer | *Capreolus capreolus* | 239 | European polecat | *Mustela putorius* | 6 |
| Red deer | *Cervus elaphus* | 2 | Coypu | *Myocastor coypus* | 3 |
| Fallow deer | *Dama dama* | 26 | Domestic sheep | *Ovis aries* | 24 |
| European hedgehog | *Erinaceous europaeus* | 259 | Rats | *Rattus spp.* | 86 |
| Domestic cat | *Felis catus* | 742 | Grey squirrel | *Sciurus carolinensis* | 604 |
| Wild cat | *Felis silvestris* | 1 | Red squirrel | *Sciurus vulgaris* | 100 |
| Crested porcupine | *Hystrix cristata* | 669 | Wild boar | *Sus scrofa* | 3678 |
| European hare | *Lepus europaeus* | 204 | Eastern cottontail rabbit | *Sylvilagus floridanus* | 816 |
| Pine and Stone martens | *Martes spp.* | 104 | Red fox | *Vulpes vulpes* | 3003 |
| European badger | *Meles meles* | 446 |  |  |  |

**Table S3.** Number of independent observations for each of the 24 mammal species detected in the study, listed alphabetically by scientific name. Species included in the statistical analysis are underlined.

## **SUPP4**: Species accumulation curves

The sampling effort varied among study areas due to personnel availability, ranging from 8 to 24 months of camera-trap activity. Devices were active from early May to the end of December 2024 in Milan; from early January 2023 to December 2024 in Florence (with intermittent sampling); from mid-March to December 2024 in Rome; and from January to mid-November 2024 in Campobasso.

Species accumulation curves were generated to assess whether the sampling effort was sufficient to capture the mammal species diversity in each study area. Curves were built using the *vegan* R package (Oksanen et al. 2008) and illustrate the relationship between species richness and sampling effort in the four cities.

The results suggest that Campobasso (CB) and Rome (RM) were sampled sufficiently to capture local diversity whereas Milan (MI) and Florence (FI) could have benefitted from a longer sampling period. Additional data collection is ongoing in these latter two cities and will be included into future analyses.


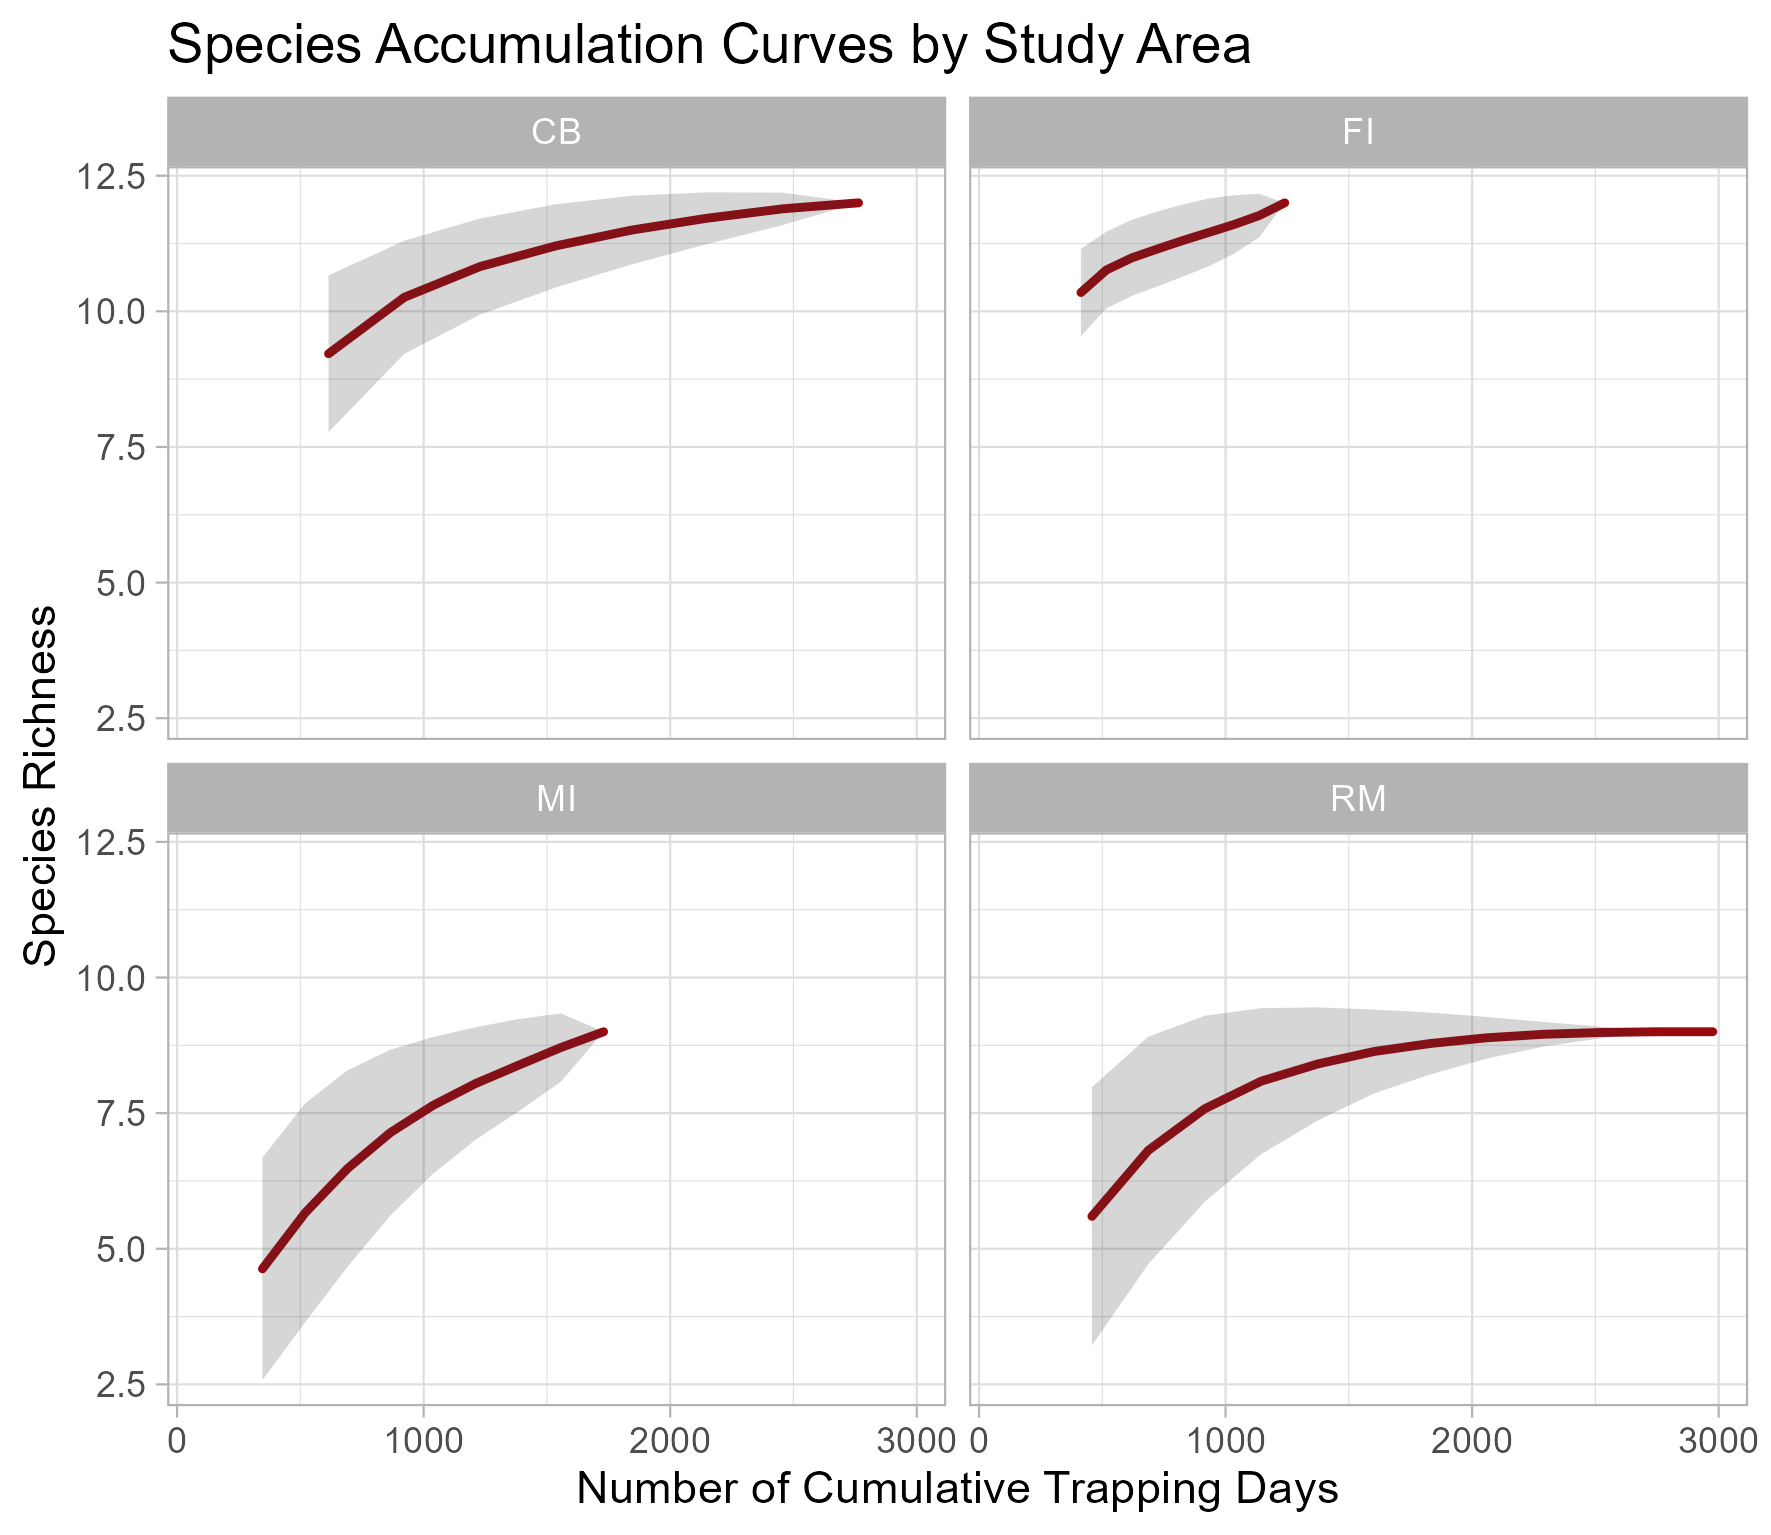


**Figure S4.** Species Accumulation Curves for each study area, illustrating the relationship between sampling effort (trap-days) and estimated mammal species richness.

## **SUPP5**: PERMANOVA results

We tested for the differences in mean species observation frequencies employing a PERMANOVA approach. The 4 tests were performed grouping the gridcells according to a different variable each time: Study Area, Green Cover, Green Fragmentation and Cell category. Additionally, we performed pairwise comparisons for group dispersion (Tuckey HSD test) and centroid separation (pairwise PERMANOVA).

In this section, we illustrate the graphic results for the 3 grouping variables for which the mean species observation frequency differences were not significant: Green Cover, Green Fragmentation and Cell Category. Furthermore, we illustrate pairwise comparison test results for each PERMANOVA test.


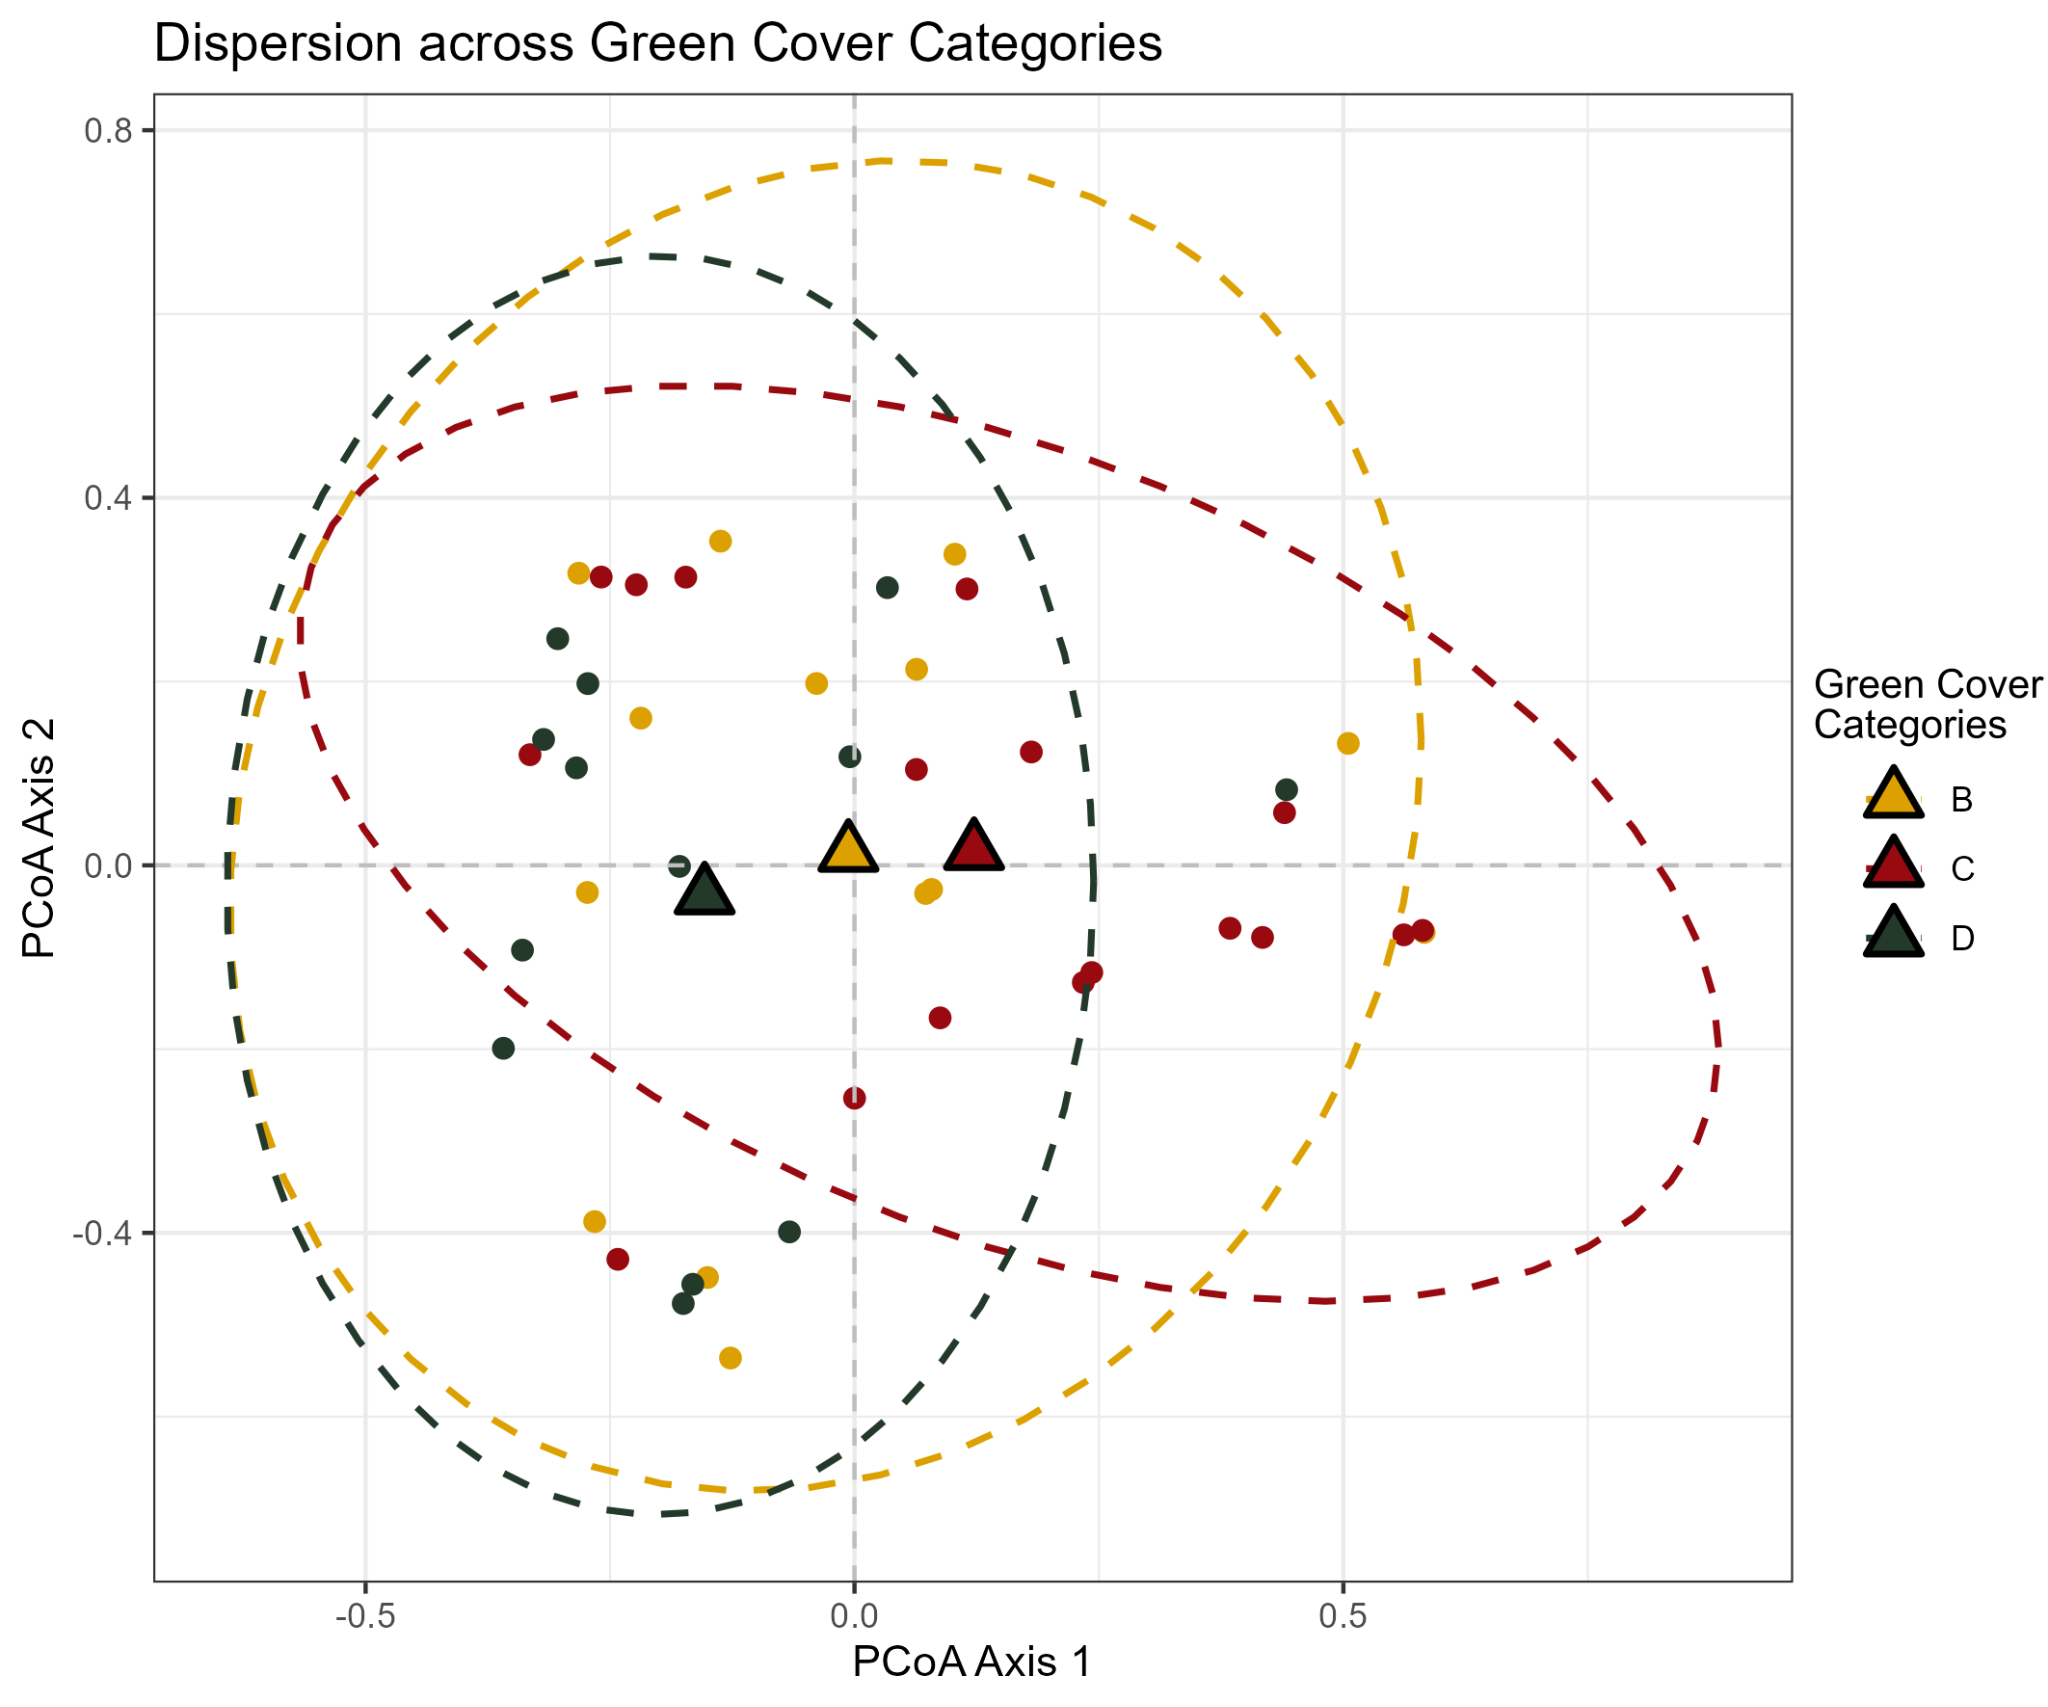


**Figure S5a).** Dispersion plot for the 48 sites grouped by Green Cover category.


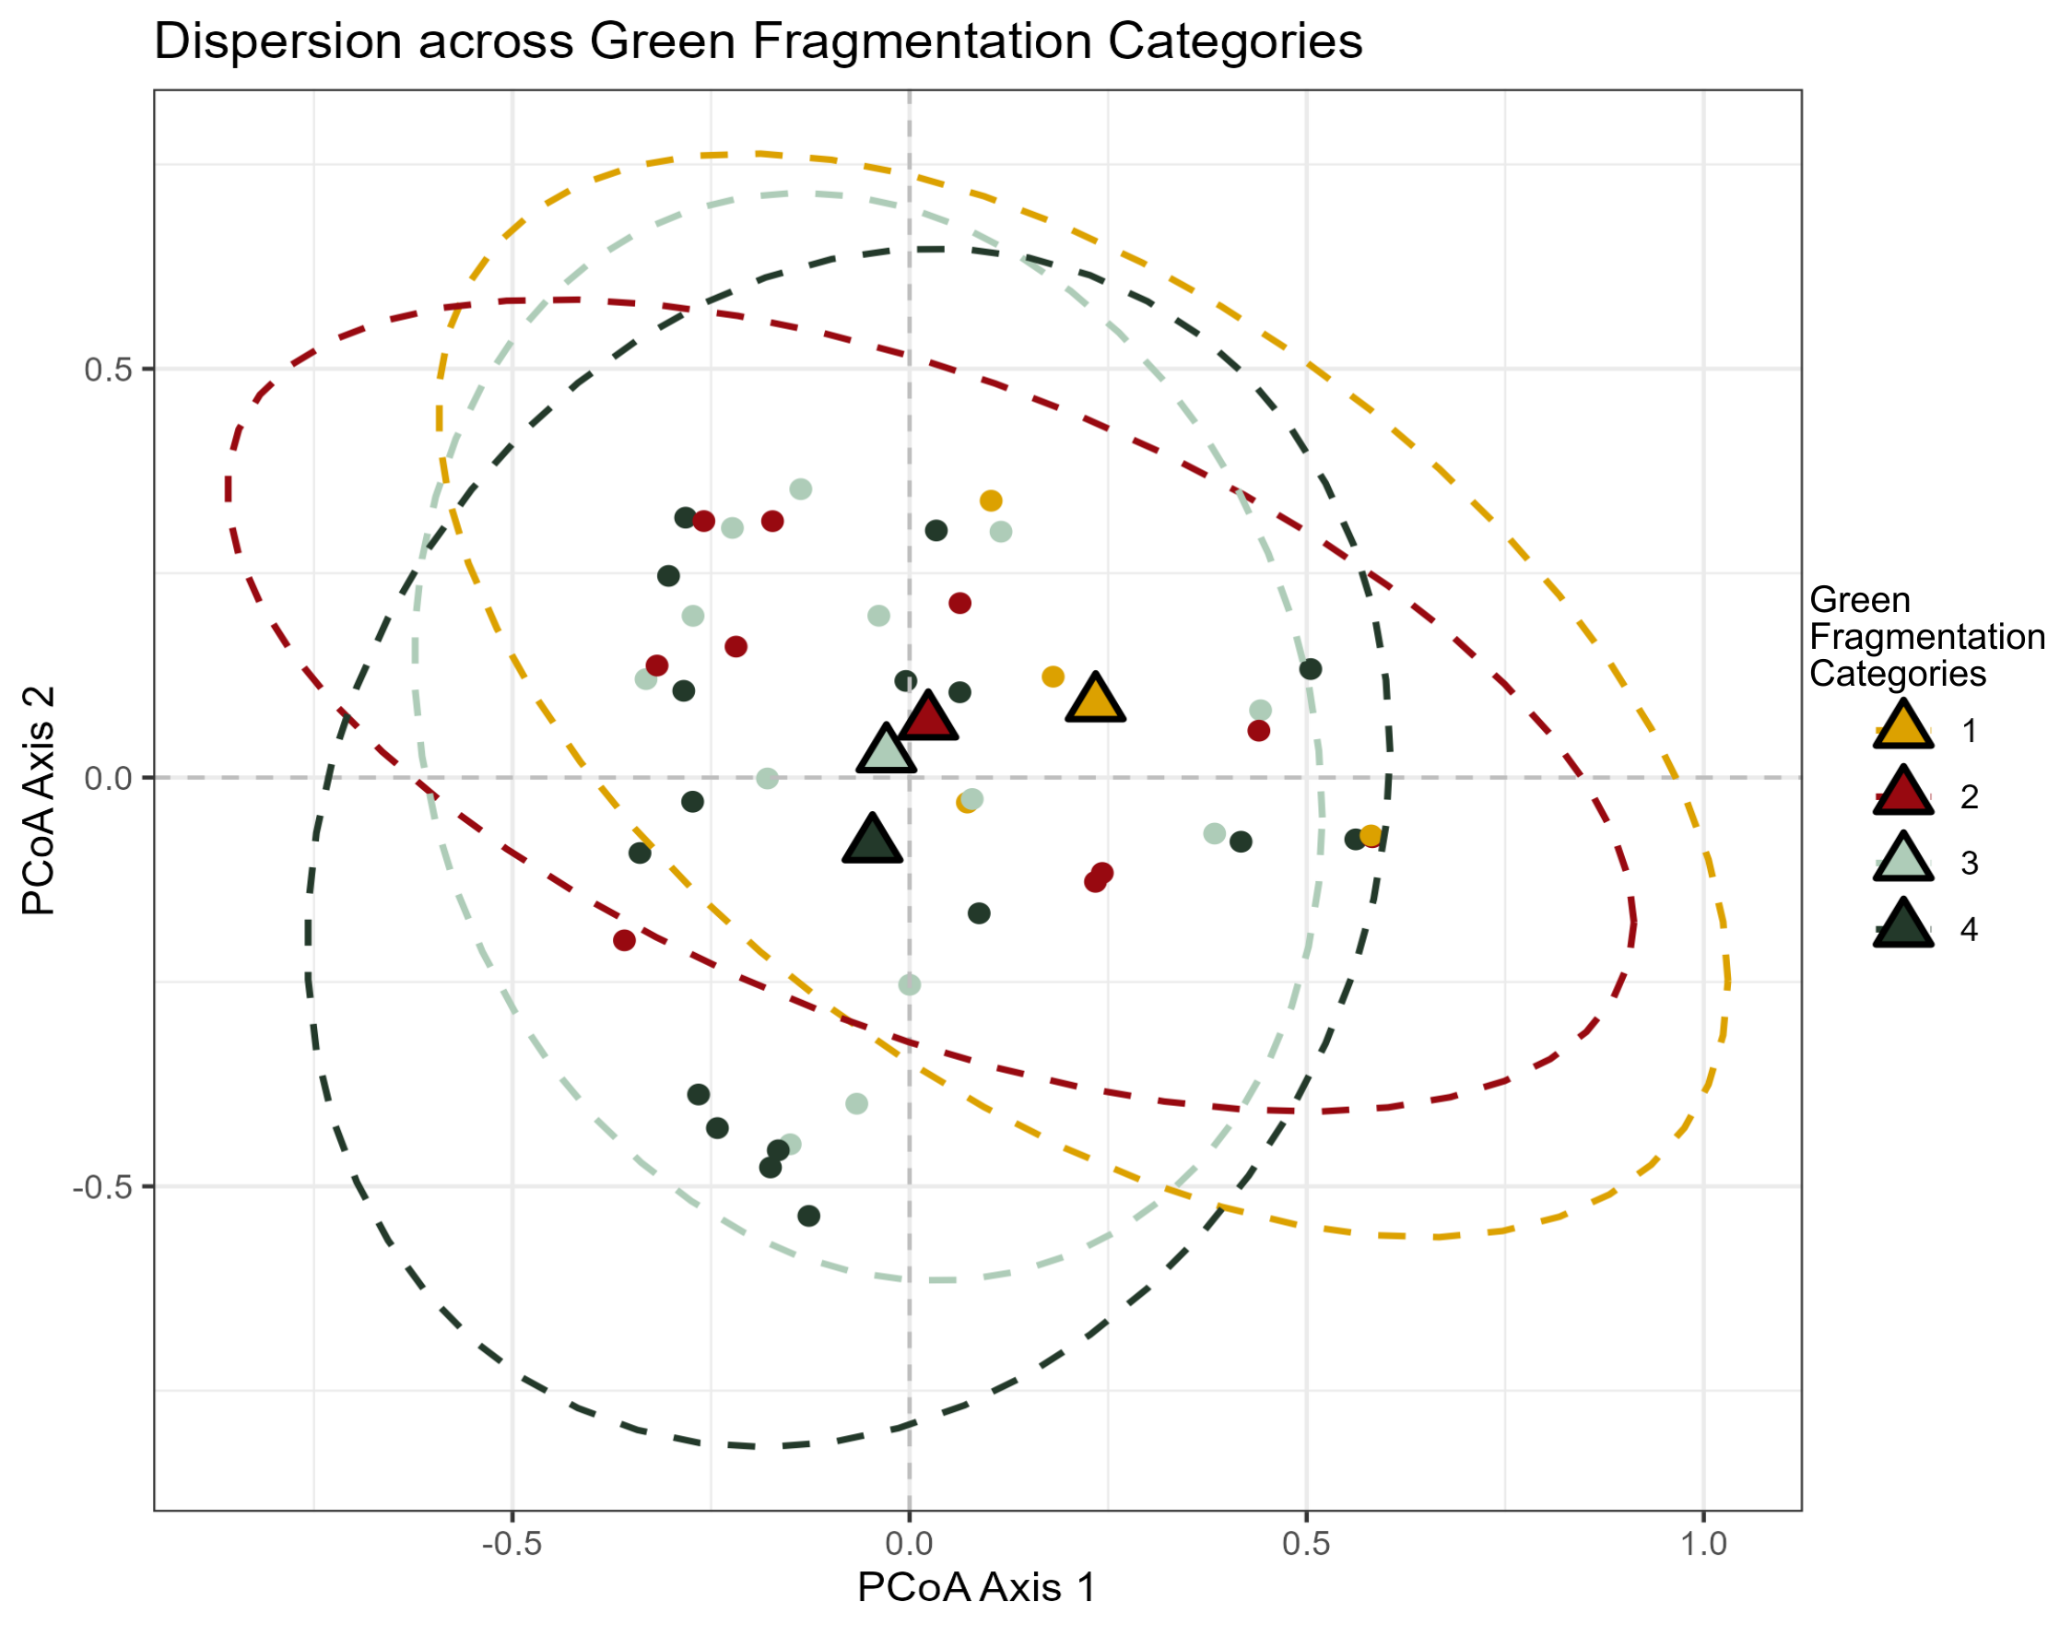


**Figure S5b).** Dispersion plot for the 48 sites grouped by Green Fragmentation category.


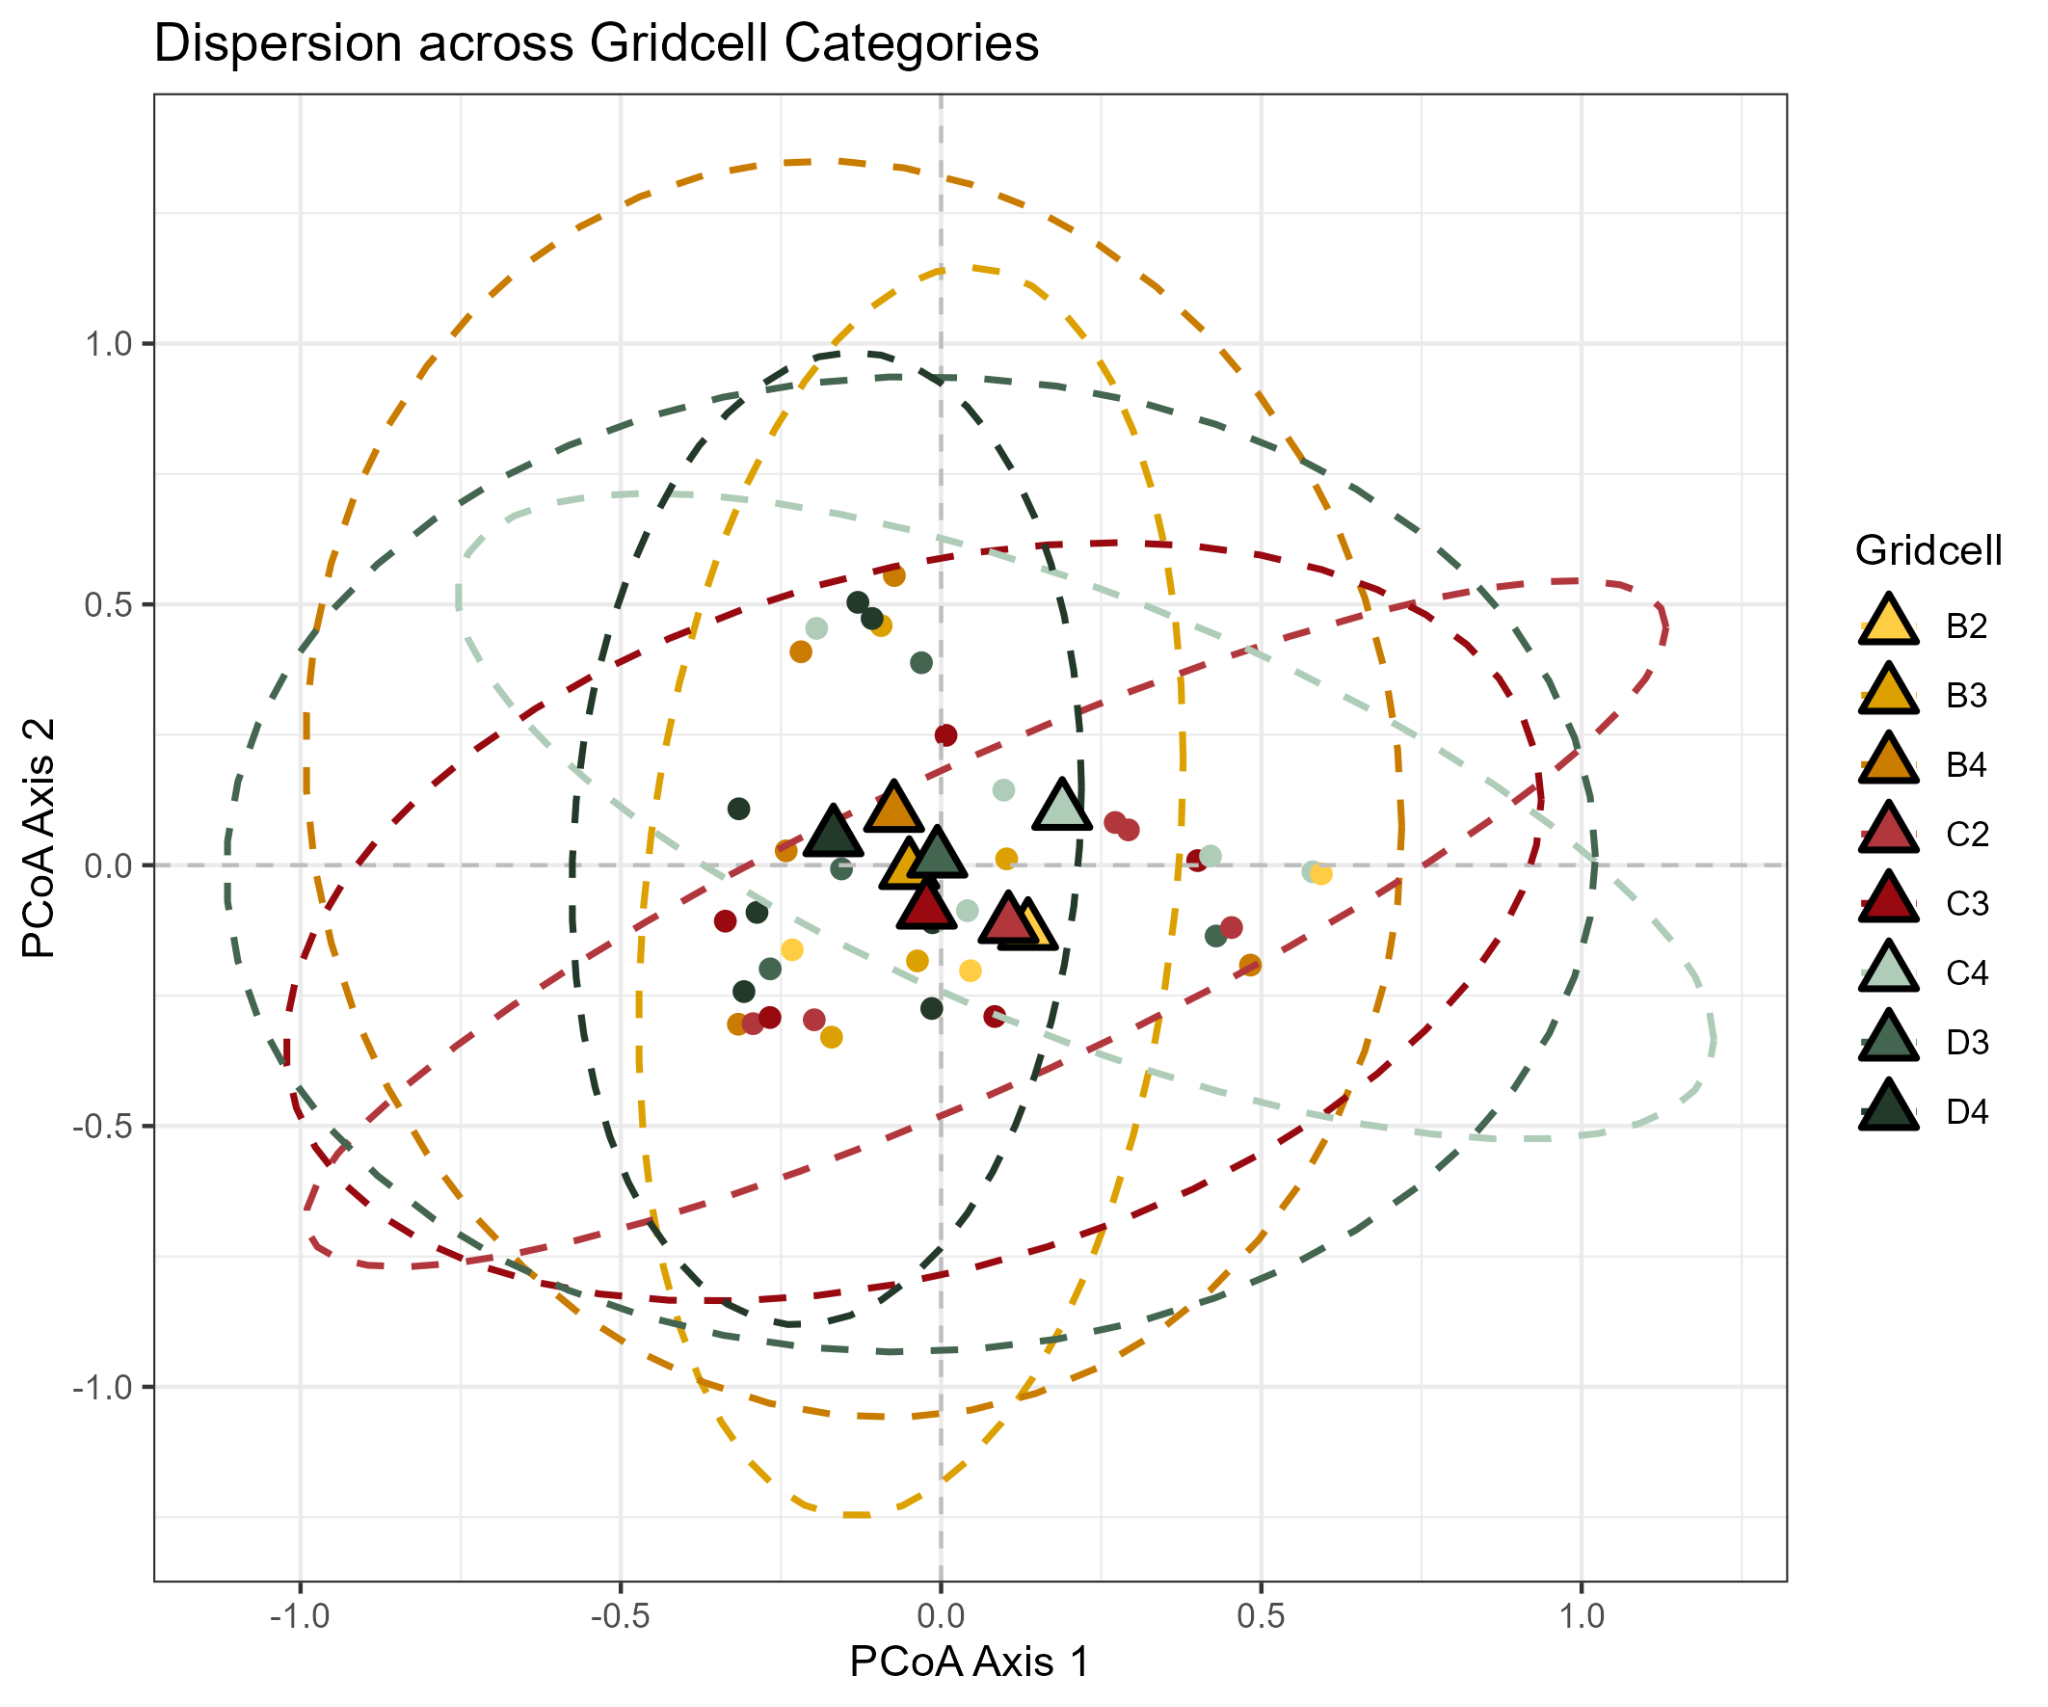


**Figure S5c).** Dispersion plot for the 48 sites grouped by Gridcell category.

| pairs | Df | SumsOfSqs | F.Model | R2 | p.value | p.adjusted |
| --- | --- | --- | --- | --- | --- | --- |
| **CELL CATEGORIES** | | | | | | |
| B2 vs B3 | 1 | 0.3771158 | 1.0219359 | 0.1697022 | 0.470 | **1** |
| B2 vs B4 | 1 | 0.2353409 | 0.6230264 | 0.0940697 | 0.727 | **1** |
| B2 vs C2 | 1 | 0.2325475 | 0.5858204 | 0.0889518 | 0.710 | **1** |
| B2 vs C3 | 1 | 0.1655735 | 0.3963087 | 0.0619590 | 0.934 | **1** |
| B2 vs C4 | 1 | 0.2179218 | 0.4602244 | 0.0712397 | 1.000 | **1** |
| B2 vs D3 | 1 | 0.2243485 | 0.4956670 | 0.0901923 | 0.918 | **1** |
| B2 vs D4 | 1 | 0.3659406 | 1.0368262 | 0.1147334 | 0.387 | **1** |
| B3 vs B4 | 1 | 0.4130436 | 1.3100592 | 0.1576474 | 0.213 | **1** |
| B3 vs C2 | 1 | 0.5117693 | 1.5425779 | 0.1805752 | 0.145 | **1** |
| B3 vs C3 | 1 | 0.3939123 | 1.1267014 | 0.1386419 | 0.335 | **1** |
| B3 vs C4 | 1 | 0.6197349 | 1.5595602 | 0.1822010 | 0.077 | **1** |
| B3 vs D3 | 1 | 0.4065529 | 1.1069336 | 0.1557540 | 0.362 | **1** |
| B3 vs D4 | 1 | 0.2876812 | 0.9366934 | 0.0942661 | 0.486 | **1** |
| B4 vs C2 | 1 | 0.4703930 | 1.3715773 | 0.1463550 | 0.239 | **1** |
| B4 vs C3 | 1 | 0.3477526 | 0.9698070 | 0.1081190 | 0.484 | **1** |
| B4 vs C4 | 1 | 0.3452204 | 0.8622506 | 0.0972948 | 0.499 | **1** |
| B4 vs D3 | 1 | 0.2083442 | 0.5555853 | 0.0735331 | 0.781 | **1** |
| B4 vs D4 | 1 | 0.1346264 | 0.4226302 | 0.0405493 | 0.885 | **1** |
| C2 vs C3 | 1 | 0.3991144 | 1.0700238 | 0.1179736 | 0.369 | **1** |
| C2 vs C4 | 1 | 0.4818942 | 1.1617845 | 0.1268077 | 0.319 | **1** |
| C2 vs D3 | 1 | 0.3149492 | 0.8045183 | 0.1030837 | 0.556 | **1** |
| C2 vs D4 | 1 | 0.5638714 | 1.7082995 | 0.1459050 | 0.105 | **1** |
| C3 vs C4 | 1 | 0.3423684 | 0.7954482 | 0.0904386 | 0.654 | **1** |
| C3 vs D3 | 1 | 0.2012232 | 0.4915931 | 0.0656193 | 0.875 | **1** |
| C3 vs D4 | 1 | 0.2770214 | 0.8086451 | 0.0748147 | 0.625 | **1** |
| C4 vs D3 | 1 | 0.3582187 | 0.7836921 | 0.1006839 | 0.773 | **1** |
| C4 vs D4 | 1 | 0.5284701 | 1.4054737 | 0.1232280 | 0.158 | **1** |
| D3 vs D4 | 1 | 0.2551931 | 0.7217657 | 0.0742422 | 0.737 | **1** |
| **GREEN COVER CATEGORIES** | | | | | | |
| B vs C | 1 | 0.4415478 | 1.168310 | 0.0387264 | 0.297 | **0.891** |
| B vs D | 1 | 0.3404165 | 1.041272 | 0.0399854 | 0.432 | **1.000** |
| C vs D | 1 | 0.7441473 | 2.026555 | 0.0674921 | 0.027 | **0.081** |
| **GREEN FRAGMENTATION CATEGORIES** | | | | | | |
| 2 vs 3 | 1 | 0.2979554 | 0.8180116 | 0.0374925 | 0.570 | **1.000** |
| 2 vs 4 | 1 | 0.4297806 | 1.1972728 | 0.0457022 | 0.270 | **1.000** |
| 2 vs 1 | 1 | 0.4386492 | 1.2042347 | 0.0912006 | 0.297 | **1.000** |
| 3 vs 4 | 1 | 0.3536299 | 0.9740210 | 0.0336170 | 0.463 | **1.000** |
| 3 vs 1 | 1 | 0.3528127 | 0.9513810 | 0.0596425 | 0.497 | **1.000** |
| 4 vs 1 | 1 | 0.5478921 | 1.5113857 | 0.0736852 | 0.138 | **0.828** |
| **STUDY AREAS** | | | | | | |
| CB vs FI | 1 | 0.5094409 | 1.450738 | 0.0709382 | 0.153 | **0.918** |
| CB vs MI | 1 | 0.8515100 | 3.184732 | 0.1577793 | 0.004 | **0.024** |
| CB vs RM | 1 | 0.6850967 | 2.014357 | 0.0915020 | 0.056 | **0.336** |
| FI vs MI | 1 | 1.2108685 | 3.715092 | 0.1566552 | 0.001 | **0.006** |
| FI vs RM | 1 | 0.4333024 | 1.135663 | 0.0470533 | 0.322 | **1.000** |
| MI vs RM | 1 | 1.1649781 | 3.679573 | 0.1490939 | 0.002 | **0.012** |

**Table S5.** Pairwise comparison for PERMANOVA tests performed after grouping the gridcells according to 4 grouping variables. P values (in bold, significant ones in green) are listed in the last column; significant pairwise differences are only found for the study area variable, specifically, between Milan and every other city.

## **SUPP6**: Random Forest model selection

We used a Random Forest (RF) approach to identify the species most influential in group differentiation among the four cities.

To optimize model performance, we performed a full Cartesian grid search, evaluating every possible combination of four hyperparameters (Boehmke and Greenwell 2020):

- the number of features considered at every split of the classification tree (*mtry*: 2, 2.8, 3.5, 4.0, 4.5);
- the complexity of each tree, represented by the minimum node size (the number of samples in a terminal node, *min_rows:* 1, 3, 5, 10) and the maximum number of splits (*max_depth:* 10, 20, 30);
- the sample rate, i.e. how many observations are drawn for each tree training (0.55, 0.632, 0.70, 0.80).

Model tuning was based on R² and Mean Squared Residual Error (MSRE) values, while final model performance was evaluated using classification accuracy under a 10-fold cross-validation framework (Boehmke & Greenwell, 2020). RF models were implemented in R using the “h2o” package (Fryda et al., 2024). The best-performing model included 120 classification trees and the following hyperparameter configuration:

*mtry = 2, min_rows = 1, max_depth = 20, sample_rate = 0.70.*

# REFERENCES

Boehmke B, Greenwell B (2020) Hands-On Machine Learning with R, 1st edition. CRC Press

Dondina O, Tirozzi P, Viviano A, et al (2025) Spatial and habitat determinants of small-mammal biodiversity in urban green areas: Lessons for nature-based solutions. Urban For Urban Green 104:128641. https://doi.org/10.1016/J.UFUG.2024.128641

ISPRA (2019) Annuario dei dati ambientali - Turismo nei Parchi

Lim B, Pacheco V (2016) SMALL NON-VOLANT MAMMALS. In: Biodiversity Sampling Protocols

Loy A, Aloise G, Ancillotto L, et al (2019) Mammals of Italy: An annotated checklist. Hystrix 30:. https://doi.org/10.4404/hystrix-00196-2019

Oksanen J, Kindt R, Legendre P, et al (2008) The vegan package. Community ecology package
